# Supplementary material for: Expression of immune regulatory genes correlate with the abundance of specific Clostridiales and Verrucomicrobia species in the equine ileum and cecum
Source: PubMed Central journal article supplement (PMC6722064; doi:10.1038/s41598-019-49081-5), 2019-09-03
Supplement: 41598_2019_49081_MOESM1_ESM.pdf [file 41598_2019_49081_MOESM1_ESM.pdf]

1 **Expression of immune regulatory genes correlates with the abundance**  
2 **of specific Clostridiales and Verrucomicrobia species in the equine**  
3 **ileum and cecum**

4

5 F. Lindenberg<sup>1,2\*</sup>, L. Krych<sup>4</sup>, J. Fielden<sup>1</sup>, W. Kot<sup>5</sup>, H. Frøkiær<sup>2</sup>, G. van Galen<sup>3</sup>, D. S. Nielsen<sup>4</sup>, A. K.  
6 Hansen<sup>2</sup>

7

8 <sup>1</sup> Brogaarden Aps

9

10 <sup>2</sup> University of Copenhagen, Faculty of Health and Medical Sciences, Department of Veterinary and  
11 Animal Sciences

12

13 <sup>3</sup> University of Copenhagen, Faculty of Health and Medical Sciences, Department of Veterinary  
14 Clinical Sciences

15

16 <sup>4</sup> University of Copenhagen, Faculty of Sciences, Department of Food Science

17

18 <sup>5</sup> Department of Environmental Sciences, Aarhus University

19

20

21

22

23

24

25

26

27

28

29

30

31

32

33

34

35

36

37

38

39

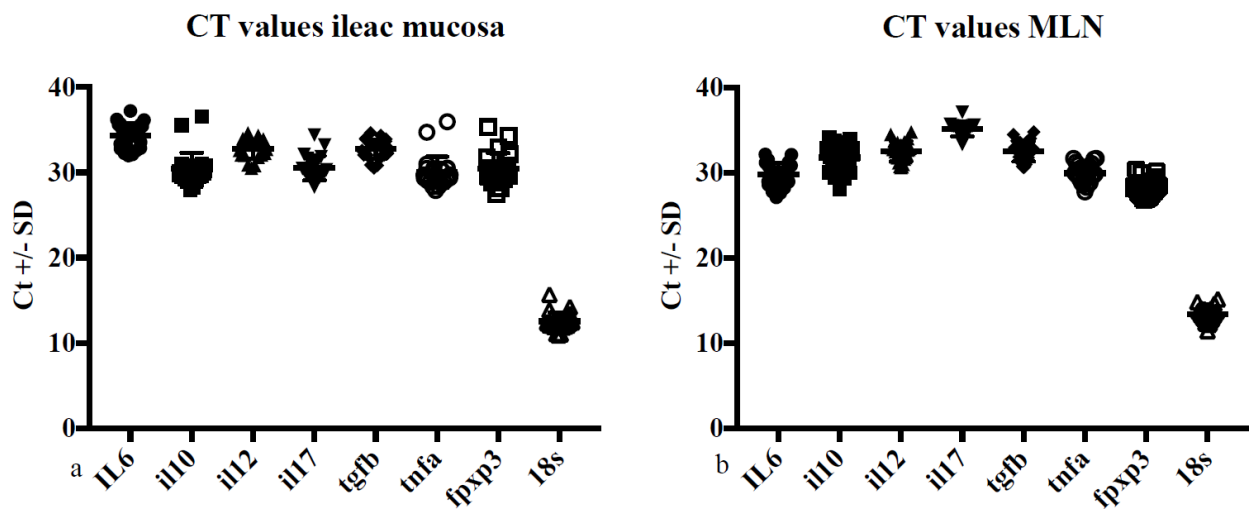

40  
 41 Supplementary figure S1: Gene-expression of *foxp3*, *tnfa*, *tgfb*, *il17*, *il12*, *il10*, and *il6* in ileal  
 42 mucosa (a) and mesenteric lymph nodes (b) measured by qPCR and expressed as mean Ct +/- SD.  
 43 In horse number 1 and 2 ileal expression of *il12*, *il17*, and *tgfb* and *il6*, *il1,2* and *il17* respectively  
 44 were not detected for unexplained reasons nor was expression of *il17* in horse 24. In the colon *il17*  
 45 expression was not detected in horses number 4, 5, 11, 17, 20, 22, 23, and 24.

46  
 47  
 48  
 49  
 50  
 51  
 52  
 53  
 54  
 55  
 56  
 57  
 58  
 59  
 60  
 61  
 62

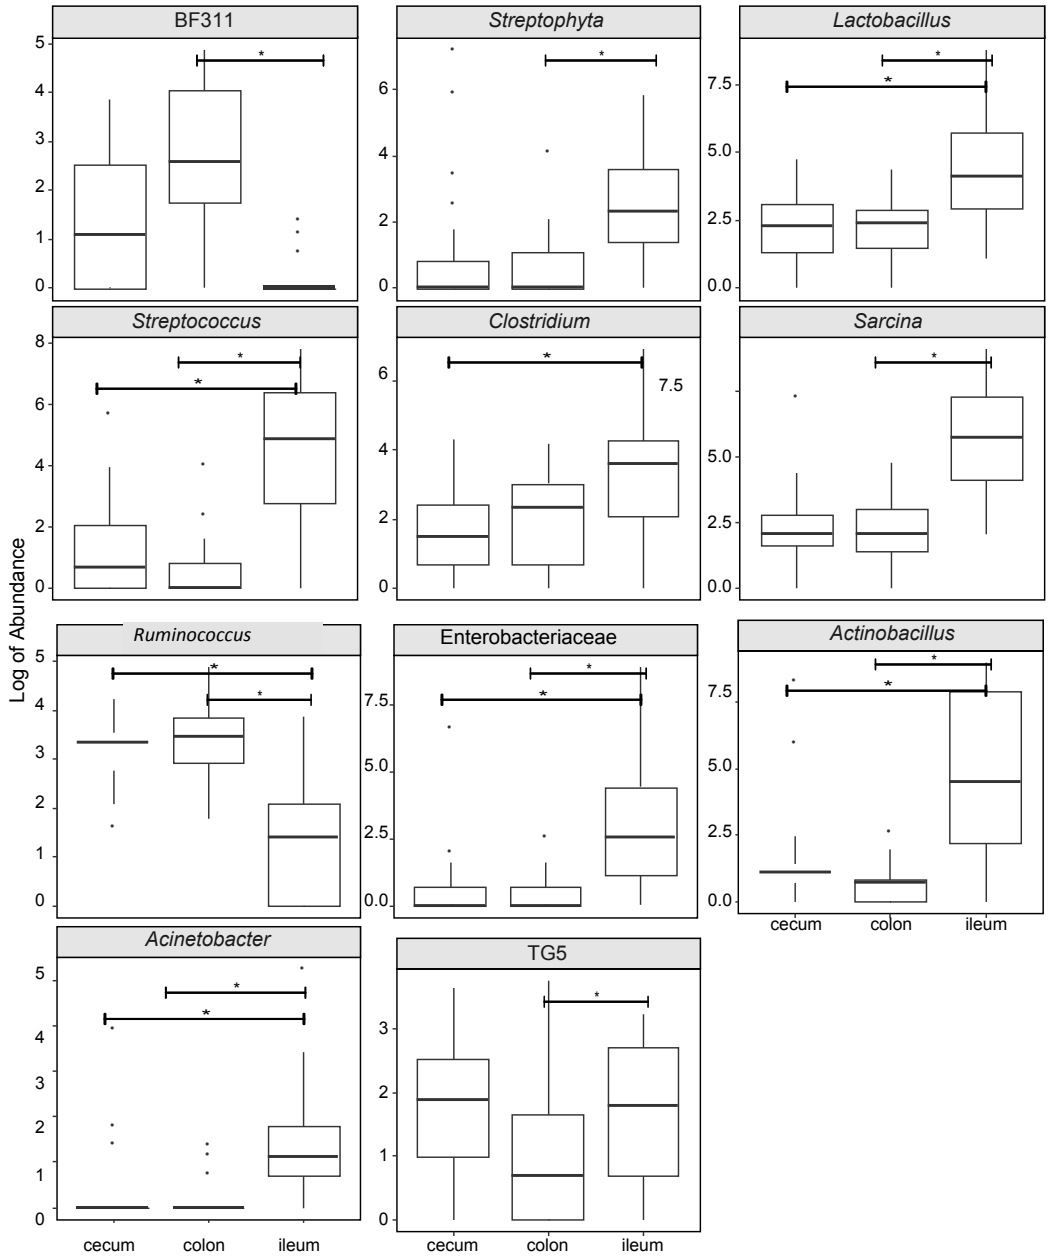

63

64

65 Supplementary Figure S2:

66 Figures shows box plots of species found to differ significantly between the ileum, cecum, and  
 67 colon. Significantly different abundances were found between the ileum and the cecum and the  
 68 ileum and colon, denoted by \* (ANCOM, FDR  $p < 0.05$ ). There were no major differences  
 69 observed between the colon and the cecum microbiota composition. Box plots show log abundance  
 70 (ANCOM analysis) on amplicon sequencing of 16S rRNA gene (V3-V4 region) within three  
 71 sections of horse gastrointestinal tract (box limits represent upper and lower quartiles, bold line the  
 72 median, whiskers the 1.5 IQR and dots the extremes).
